# Supplementary material
Source: MDPI journal article supplement (https://www.mdpi.com/2304-6775/7/1/8)
Supplement: s1 [file s1]

Article

# Genre Pedagogy and Bilingual Graduate Students' Academic Writing

Teresa Morell \* and Susana Pastor Cesteros

Universidad de Alicante, 03690, San Vicente del Raspeig, Spain; spc@ua.es

\* Correspondence: mt.morell@ua.es; Tel.: +34-590-3439

Received: 28 November 2018; Accepted: 14 January 2019; Published: 26 January 2019

---

## Supplementary Information 1. Students' Questionnaire: Applied Linguistics for Teaching Second Languages (2013–2014)

### 1. Before taking this subject, how many research articles (RAs) had you read?

|                      |
|----------------------|
| None                 |
| One article          |
| 1 to 3 articles      |
| 3 to 6 articles      |
| More than 6 articles |

### 2. If you had read RAs, in which language?

|                      |
|----------------------|
| In Spanish           |
| In English           |
| In English & Spanish |
| In other languages   |

### 3. For what reason did you read the article(s)?

|                                                                                            |
|--------------------------------------------------------------------------------------------|
| To obtain information about the topic.                                                     |
| To carry out a project or write a paper for a subject.                                     |
| To become familiar with the structure of research articles and to be able to write my own. |
| Other                                                                                      |

### 4. Have you read the recommended bibliography for academic writing?

|                                 |
|---------------------------------|
| No, I have not had time.        |
| Only Swales & Feak (in English) |
| Only Vázquez (in Spanish)       |
| Swales & Feak and Vázquez       |
| Other                           |

5. If you have read the bibliography, tell us if you have found it useful or not. Please, explain.

6. Was the class explanation on the structure of RAs helpful?

|       |  |
|-------|--|
| Yes   |  |
| No    |  |
| Other |  |

7. Have you used the materials (ppt. on RAs) on the virtual campus after the class explanation?

|       |
|-------|
| Yes   |
| No    |
| Other |

8. Has the reading and analysis of another RA been helpful for you to elaborate your group project?

|       |
|-------|
| Yes   |
| No    |
| Other |

9. If so, how exactly has it helped you? If you wish to indicate only one or some of the following items, please explain next to 'Other'

|                                                    |
|----------------------------------------------------|
| To establish the macrostructure                    |
| To think of a clear title                          |
| To write a good abstract                           |
| To identify key words                              |
| To learn the possible 'moves' for each part        |
| To do the actual writing                           |
| To know how to cite the bibliographical references |
| All of the above                                   |
| Other                                              |

10. Has having read and analysed the RA in one language and then having written the group project in another caused you any problems? If so, please specify the precise problems this may have caused you, next to 'Other'

|       |
|-------|
| Yes   |
| No    |
| Other |

11. Do you think it is possible to transfer what you have learned about RAs in one language so as to write in another?

|     |
|-----|
| Yes |
| No  |

## 12. Comments and Suggestions

### Supplementary Information 2. Instructions for Analyzing A Research Article from A Language Teaching Research Journal

#### 1. Read and study:

Gallardo, S. (2005). La monografía universitaria como aprendizaje para la producción de artículos científicos. En Vázquez, G. (coord.). *Español con fines académicos: de la comprensión a la producción de textos*. Madrid: Edinumen, 13–28.

Otañi, I. (2005). El resumen o *abstract* del artículo de investigación en español: características retórico-lingüísticas. En Vázquez, G. (coord.). *Español con fines académicos: de la comprensión a la producción de textos*. Madrid: Edinumen, 45–72.

Regueiro Rodríguez, M<sup>a</sup> L. y Sáez Rivera, D. M. (2015). *El español académico: guía práctica para la elaboración de textos académicos* (2<sup>a</sup> ed. revisada y ampliada; 1<sup>a</sup> ed. 2013). Madrid: Arco-Libros.

Swales, J. & Feak, C. (2004). “Constructing a Research Paper I & II”, in *Academic Writing for Graduate Students. 2<sup>nd</sup> Edit*, Michigan: Michigan University Press, 222–229; 243–286.

Van Enk, A. & Power, K. (2017). What is a research article?: Genre variability and data selection in genre research. *Journal of English for Academic Purposes*, 29, 1475–1585.

#### 2. Browse through the recommended journals found on the AcqUA thematic guide <http://ua-es.libguides.com/c.php?g=654300&p=4595366>. Choose a research article (RA) of interest to you.

#### 3. Read the RA carefully and keep in mind that you will be analysing its structure (i.e., parts and moves) and the language (i.e., verb tenses, passive voice, discourse markers, citations, hedging, etc.) of the article (not the content). Below you will find questions to guide your analysis.

Questions to ask yourself when analysing the macrostructure:

- How many words are in the title? Does it make use of connectors, noun phrases? Is it in the form of a complete sentence? Does it give a good idea of what the article is about? Do you think it is appropriate?
- How is the abstract structured? Does it tell you: what it is about, what was done, what was found, and what was concluded?
- Are there key words? Do they describe the content of the RA? How many are there? Are they translated?
- How is the article structured? (The macrostructure) Does it follow the Swalesian IMRD scheme?
- Are the topic, the objective, and the theoretical framework of the article clearly stated in the introduction? Does the introduction follow through with Swales' CARS (Create a Research Space)? Does it include an extensive literature review?
- Is the main objective related to research questions and/or a hypothesis?
- Is it clear in the methodology section which is the type of study carried out (qualitative, quantitative, case study, survey, etc.) and what was done?
- How are the results presented? Are they analysed/interpreted and discussed within the results section or in a separate discussion section?
- Are conclusions drawn? Are they what was expected?
- Is there an adequate and up to date bibliography? Which citing style is used? APA? MLA?
- How many books and articles are cited within the text? How many are found in the bibliography? In which sections of the article are there more cited references?

Questions to ask yourself when analysing the microstructure:

- Are there indications of formal or informal register?
- What verb tenses are used in each part?

- Is the passive voice used? Is there much hedging?
- What kinds of discourse markers are used?
- How is the work of others cited within the text?
- Give examples of each.

Final questions:

- What is the effect of the particular structure and/or language used in the article on the reader? Who could benefit from this article? Would you recommend it?
- What have you learned or become more aware of through this RA analysis task? How will it help you with other academic tasks?

### Supplementary Information 3. Evaluation criteria for RA analysis/group paper

#### STUDENT/GROUP

| EVALUATION ITEMS                   | POINTS                                                                          | SCORE | GRADE |
|------------------------------------|---------------------------------------------------------------------------------|-------|-------|
| 1. Overall Presentation            | Formal presentation                                                             | 0.5   |       |
|                                    | General structure                                                               | 0.5   |       |
| 2. Objective                       | Establishment of purpose/framework/type of study                                | 1.0   |       |
| 3. Macrostructure & moves          | Title                                                                           | 0.5   |       |
|                                    | Abstract                                                                        | 0.5   |       |
|                                    | Introduction                                                                    | 0.5   |       |
|                                    | Methodology                                                                     | 0.5   |       |
|                                    | Results                                                                         | 0.5   |       |
|                                    | Discussion                                                                      | 0.5   |       |
| 4. Microstructure & Language       | Language use (lexical & grammatical accuracy and appropriateness) & Terminology | 1.0   |       |
|                                    | Identification of microstructure (register, tenses, voice, markers, hedging)    | 1.0   |       |
|                                    | Citations                                                                       | 1.0   |       |
| 5. Conclusions & references        | Conclusions & final evaluation                                                  | 1.0   |       |
|                                    | References                                                                      | 1.0   |       |
| <b>GLOBAL GRADE &amp; COMMENTS</b> | <b>Total: 10</b>                                                                |       |       |

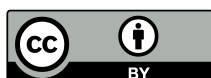

© 2019 by the authors. Licensee MDPI, Basel, Switzerland. This article is an open access article distributed under the terms and conditions of the Creative Commons Attribution (CC BY) license (<http://creativecommons.org/licenses/by/4.0/>).
